# Supplementary material for: CD47 Promotes Age-Associated Deterioration in Angiogenesis, Blood Flow and Glucose Homeostasis
Source: PubMed Central journal article supplement (PMC7407670; doi:10.3390/cells9071695), 2020-07-15
Supplement: cells-09-01695-s001.pdf [file cells-09-01695-s001.pdf]

# Supplementary Materials

## Supplementary Figure 1

A)

|     |           | Demographic Information |             |                  |                           |  |
|-----|-----------|-------------------------|-------------|------------------|---------------------------|--|
| No. | Age (yrs) | Gender                  | Weight (kg) | Ethnicity        | Cause of Death            |  |
| 1   | 28        | M                       | 62          | African American | Head Trauma               |  |
| 2   | 32        | F                       | 55          | Caucasian        | Anoxia                    |  |
| 3   | 21        | M                       | 98          | Hispanic         | Head Trauma               |  |
| 4   | 61        | F                       | 70          | Caucasian        | Trauma (gunshot)          |  |
| 5   | 63        | M                       | 68          | Caucasian        | Cerebrovascular Accident  |  |
| 6   | 72        | M                       | 76          | Caucasian        | Trauma (vehicle accident) |  |

B)

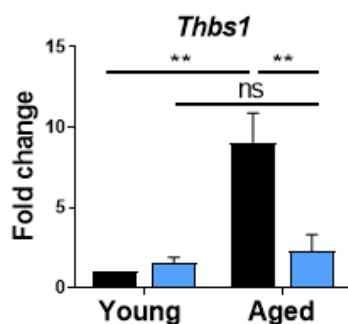

C)

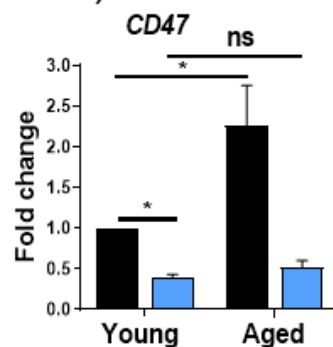

D)

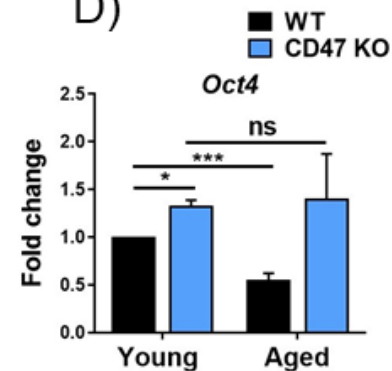

E)

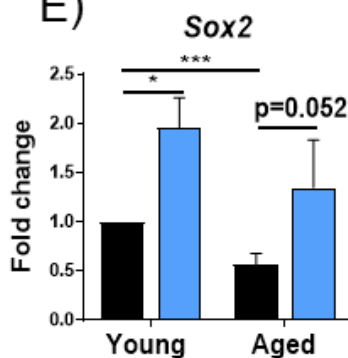

F)

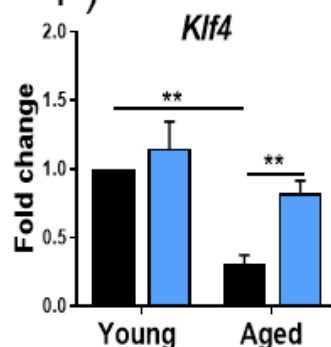

G)

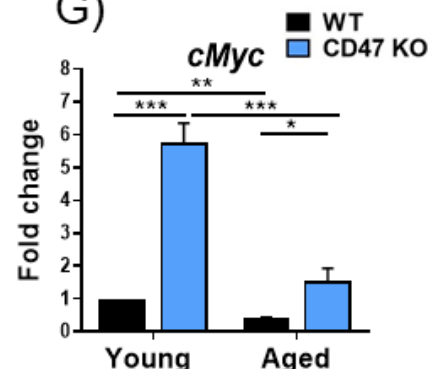

**Supplementary Figure 1.** Demographic characteristics of organ donors (A); Age-associated induction of TSP1 is attenuated, and OSKM sustained, in the absence of CD47 (B–G). Gene expression profiling by q-PCR of *Thbs1* and *Cd47* (A and B) and self-renewal factors *OCT4*, *SOX2*, *KLF4*, and *cMYC* (C–F) in aortas from young (3-month-old) and aged (18-month-old) mice. Error bars represent the mean  $\pm$  SEM, samples in triplicate/mouse; 3–5 mice/group. Data normalized to 18srRNA gene. \* $p < 0.05$ , \*\* $p < 0.01$ , \*\*\* $p < 0.001$ .

Supplementary Figure 2

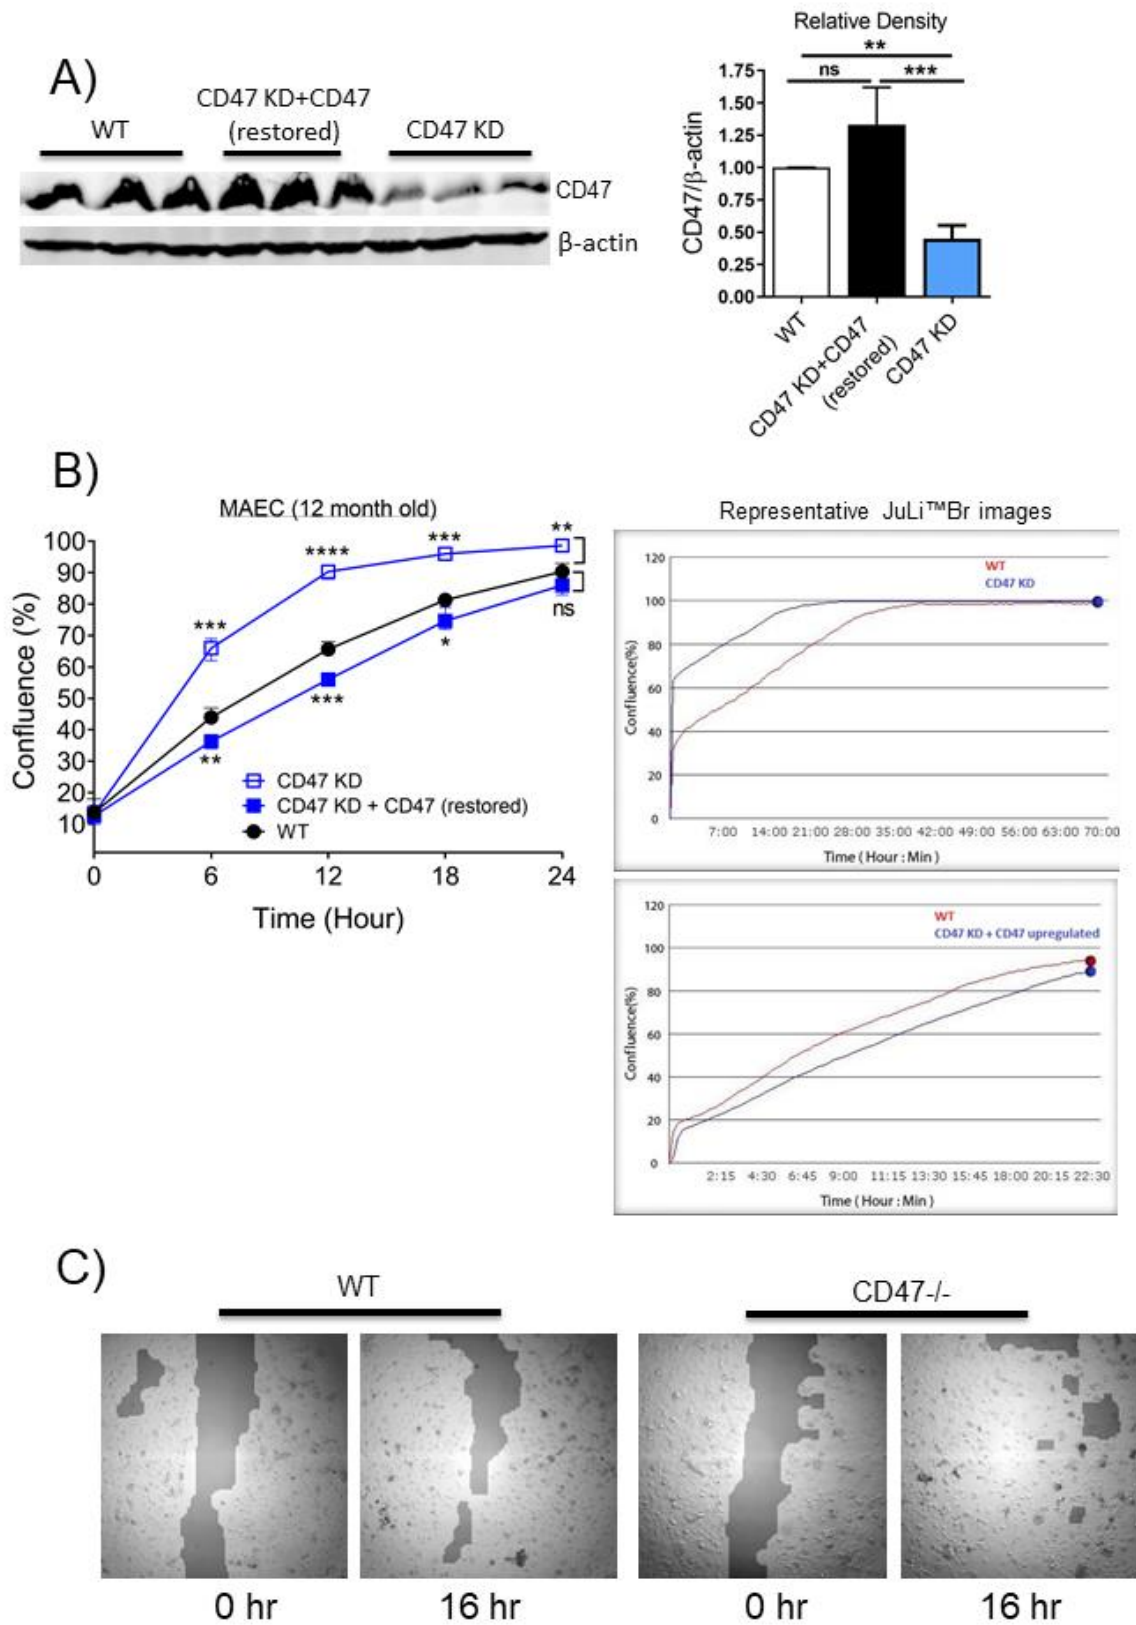

**Supplementary Figure 2.** Restoring CD47 in CD47-depleted ECs using TNF- $\alpha$  (50 ng/mL), middle lanes (A). Increasing CD47 levels rescues wildtype behavior in CD47-depleted 12 month old mouse aortic ECs (MAEC) (B, left graph), with representative JuLi™Br images on the right. CD47 delays restoration of endothelial scratch wounds (C), with representative images of endothelial cell monolayer scratch wounds at 0 and 16 h.

## Supplementary Figure 3

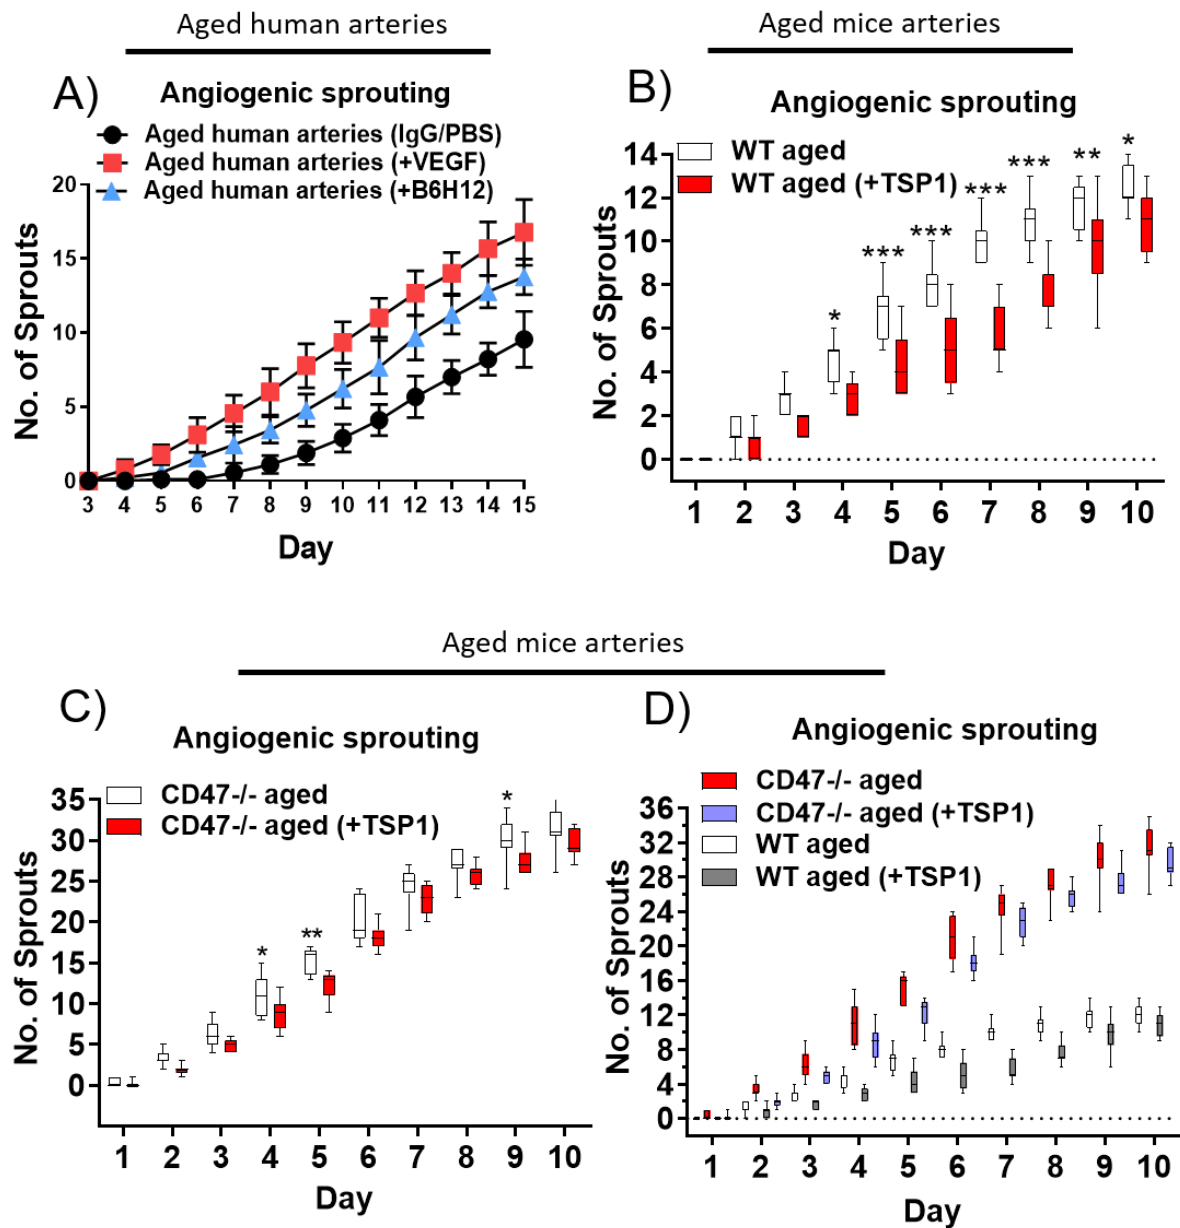

**Supplementary Figure 3.** Comparison of angiogenic sprouting in human and mouse arteries under various conditions. Side-by-side comparison of angiogenic sprouting in arteries from older individuals treated with a CD47 antibody (2  $\mu\text{g}/\text{mL}$ ) or VEGF (50ng/mL) (A). TSP1 (2.2 nM) inhibited sprouting in aged mice arteries compared to controls (B) TSP1 was ineffective to inhibit the increased sprouting seen in aged CD47-null aortic rings (C) and side by side comparison of the results (B and C) in (D). Side-by-side comparison of results (C). Error bars represent the mean  $\pm$  SEM. 3 wells/vessel, 3 subjects/group. Unpaired t-test between the matched groups of each day. \* $p < 0.05$ , \*\* $p < 0.01$ , \*\*\* $p < 0.001$ .

## Supplementary Figure 4

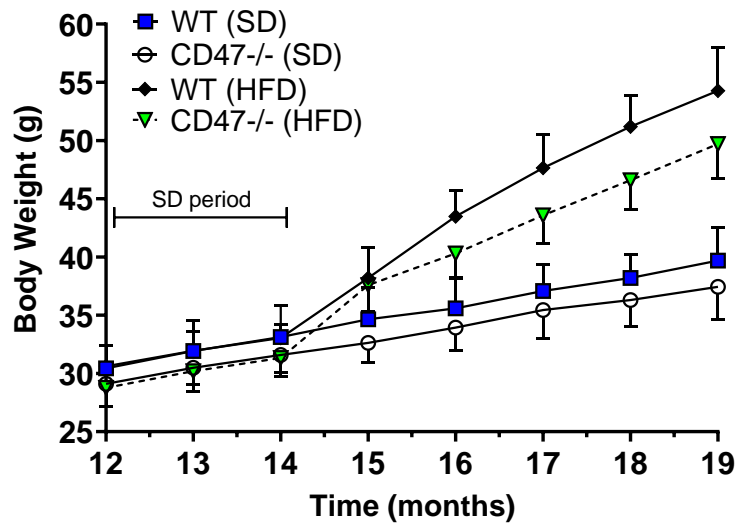

**Supplementary Figure 4.** Absence of CD47 retards HFD-induced weight gain with age. Body weight measurements of wild-type (WT) and CD47-null mice. All groups were on a standard diet (SD) until 14 months of age after which two groups (10 mice/group) were placed on the HFD and weight monitored until 19 months of age. Unpaired t-test between weight measurements of aged WT and CD47-null mice on the HFD, \* $p < 0.05$ , \*\* $p < 0.01$ , \*\*\* $p < 0.001$ .
